# Supplementary material for: A three-modal epitaxial adsorption of formamide (HO–C–NH2) on the {111} surfaces of f.c.c. alkali halide crystals growing from aqueous solutions
Source: Royal Society of Chemistry journal article supplement (doi:10.1039/c6ce01984f), 2016-01-01
Supplement: c6ce01984f1.pdf [file c6ce01984f1.pdf]

## Electronic Supporting Information

Parts of two papers (we recently published) are proposed to the readers, in order to prove that the existence of foreign 2D-adsorbed epi-layers on a growing crystal face is not a “hypothesis” but the logical consequence of ordered ab-sorption into the growth sectors, as evidenced by experimental measurements.

### A. Calcite ( $\text{CaCO}_3$ ) crystallizing in the presence of lithium ions

#### 1) – The historical background

The influence of  $\text{Li}^+$  ions on the crystal morphology of calcite became a matter of some interest twenty years ago, when: i)- Rajam and Mann found that the  $\{00.1\}$  platy form was added to the classic  $\{10.4\}$  cleavage rhombohedron growing in  $\text{Li}^+$  doped aqueous solutions; ii)- Nefyodova et al. confirmed that  $\{10.4\}$  shaped seeds transform into crystals dominated by the  $\{00.1\}$  form in  $\text{Li}^+$  bearing hydrothermal solutions. Both IR spectra and evaluation of the  $\text{Li}^+$  segregation energy on the  $\{00.1\}$  form suggested that  $\text{Li}^+$  cannot be absorbed within the growing calcite, but only randomly adsorbed in “...*lattice and not interstitial sites*...” on the  $\{00.1\}$  surfaces, so slowing down their advancement rate. No interpretation was given, at that time, on the growth mechanisms ruling this unusual morphological change (from kinked -K to flat -F character) of the  $\{00.1\}$  form.

#### 2) – The “morphodrome” ( $\text{CaCO}_3, \text{Li}^+$ ). The $\{00.1\}$ , $\{01.8\}$ and $\{10.4\}$ forms affected by the adsorption of $\text{Li}^+$ ions

A practical way of representing the morphological changes of a crystal in the presence of a variable amount of an impurity, is to draw a *morphodrome*, i.e. a diagram with the impurity concentration ( $C_i$ ) on the abscissa and the supersaturation,  $\beta = (C - C_{\text{eq}})/C_{\text{eq}}$ , with respect to the growing crystal, on the ordinate axis. In this way, the occurrence domain of the different morphologies can be drawn in a 2D space.

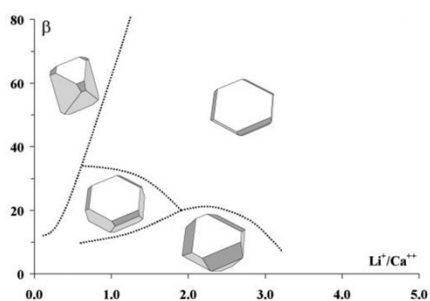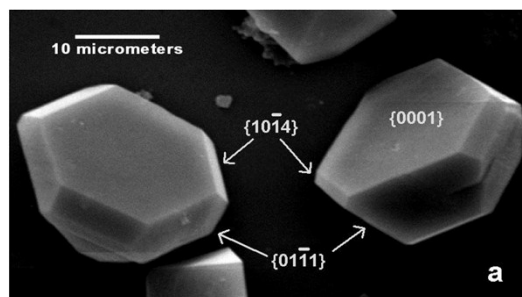

**Fig. 1** Morphodrome of calcite crystals nucleated and grown under varying initial  $[\text{Li}^+]/[\text{Ca}^{2+}]$  concentration ratios and supersaturations. Different domains are associated to the most frequent observed habit. Figure reprinted with permission

from “Morphology of calcite ( $\text{CaCO}_3$ ) crystals growing from aqueous solutions in the presence of  $\text{Li}^+$  ions. Surface behavior of the  $\{0001\}$  form” by L. Pastero, E. Costa, M. Bruno, M. Rubbo, G. Sgualdino, D. Aquilano; *Crystal Growth & Design* 4, issue 3 (2004), 485–490. Copyright C\_2004, American Chemical Society.

Figure 1 shows that, when lithium is added to the aqueous solutions supersaturated with respect to calcite, the  $\{00.1\}$  and the  $\{01.1\}$  forms enter enriching the crystal morphology which was built up by the sole  $\{10.4\}$  form when formed from pure medium (under the same  $\beta$  value and  $[\text{Ca}^{2+}]/[\text{CO}_3^{2-}]$  ratio). The importance of the  $\{00.1\}$  form increases when crystals nucleate and grow, in a steady state, in the presence of increasing amounts of lithium. Then, the crystal habit becomes more and more  $\{00.1\}$  platy starting from an initial  $[\text{Li}^+]/[\text{Ca}^{2+}]$  concentration ratio equal to 0.01. From SEM and AFM observations it comes out that the  $\{00.1\}$  form shows layered surfaces within a wide range of supersaturations. A general ex-situ overview of crystals obtained at moderate  $\beta$  values ( $4 < \beta < 37$ ) indicates that the  $\{00.1\}$  surfaces are populated by pseudo-hexagonal growth hillocks built by more or less periodic sequence of terraces and macrosteps (figures 2a,b).

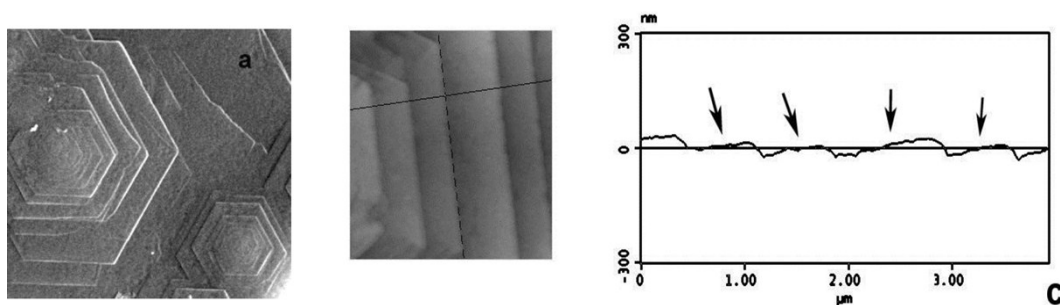

**Fig. 2** Surface structure of the  $\{00.1\}$  calcite form grown in the presence of lithium. (a) SEM image showing pseudo-hexagonal growth hillocks. Macrosteps run along the  $\langle 100 \rangle$  directions. (b,c) AFM images of the profile of the terraces lying in between successive macrosteps showing small cobbles (arrows) and the wavy surface structure. Figure reprinted with permission from “Morphology of calcite ( $\text{CaCO}_3$ ) crystals growing from aqueous solutions in the presence of  $\text{Li}^+$  ions. Surface behavior of the  $\{0001\}$  form” by L. Pastero, E. Costa, M. Bruno, M. Rubbo, G. Sgualdino, D. Aquilano; *Crystal Growth & Design* 4, issue 3 (2004), 485–490. Copyright 2004, American Chemical Society.

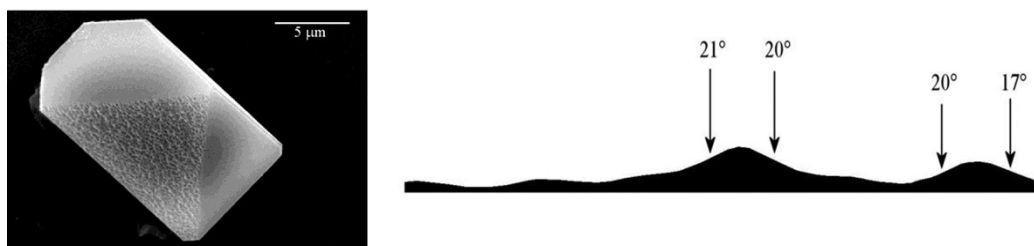

**Fig. 3** Calcite crystal nucleated and grown from lithium bearing solution at high supersaturation values ( $\beta \geq 37$ ): the  $\{00.1\}$  faces begin to roughen (left side). The slopes of the growth hillocks on the  $\{00.1\}$  faces (right side).

Their mean thickness varies in between 5 and 35 nm, while the hillocks slope increases from  $1^\circ$  to  $6.5^\circ$  with increasing supersaturation. Hence it can be said that the kinetic behavior of  $\{00.1\}$  form is that of a F-form, independently of the step origin (2D nucleation or spiral growth). Moreover, from a deeper analysis of the profile of the terraces lying in between two successive macrosteps, it turns out that the terrace surfaces are not atomically flat. On the contrary, they are slowly wavy and populated by small cobbles whose height does not exceed a few nanometers (figure 5c). These cobbles behave as true obstacles for the spreading of the  $d_{00.1}$  layers which slow down their advancement rate; this, in turn, generates the step bunching which is responsible of the macrostep occurrence.

Nevertheless, at low  $\beta$  values, the  $\{00.1\}$  form really behaves as a F form. But, as much as the supersaturation increases, both height and size of the terrace cobbles increases too, so slowing down the velocity of the macrosteps. A critical situation occurs when, at high  $\beta$  values, the cobbles height is able to compete with the macrosteps height, so hindering their flow.

When this critical threshold is reached the inverse  $F \rightarrow K$  transition takes place (see figure 3).

To clarify the effects induced by lithium on growing calcite crystals, one has to observe the  $\{10.4\}$  seeds, initially grown in pure medium and, successively, re-grown in a lithium bearing supersaturated solution: the layer growth starting from  $\{00.1\}$  surfaces can also propagate on contiguous  $\{10.4\}$  form and generates new  $\{01.8\}$  surfaces. Figures 4a,b illustrate two successive stages of this covering effect on a  $\{10.4\}$  seed. Figure 4a shows that once lithium is added to the mother solution new layers start to stabilize the  $\{00.1\}$  form and then continue spreading on the adjacent free surfaces following the symmetry imposed by the triad  $[001]$  axis.

Figure 4b shows a successive stage of the covering which stopped just before the initial rhombohedron was entirely encompassed. It is worth also outlining that the  $\langle -441 \rangle$  edges of the original seed were replaced (during growth) by small rectangular shaped  $\{01.8\}$  surfaces. Moreover, the macroscopically stepped profile which characterizes the  $\{01.8\}$  surfaces of the natural samples (figure 5a) does no longer appear in crystals grown in the presence of lithium; on the contrary, the  $\{01.8\}$  surfaces illustrated in figure 4 are smoothed and look like those of the adjacent  $\{10.4\}$  and  $\{00.1\}$  flat forms. We may invoke also in this case the role of the 2D epitaxy as the modifier of the character of  $\{01.8\}$  surfaces (from S to F).

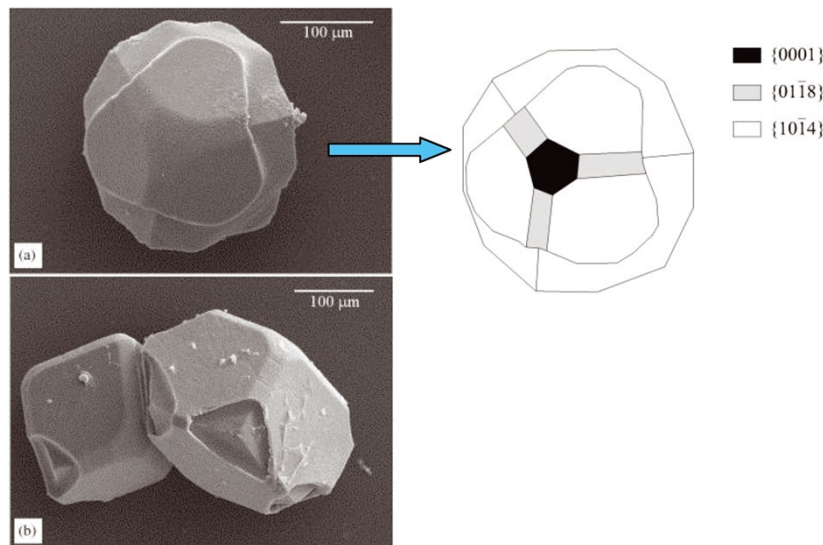

**Fig. 4 (a,b)** The morphology changes induced on the  $\{10.4\}$  seeds of calcite by the presence of  $\text{Li}^+$  ions in the mother solution. The new  $\{00.1\}$  and  $\{01.8\}$  surfaces are smoothed and look like those of the adjacent  $\{10.4\}$  flat form.

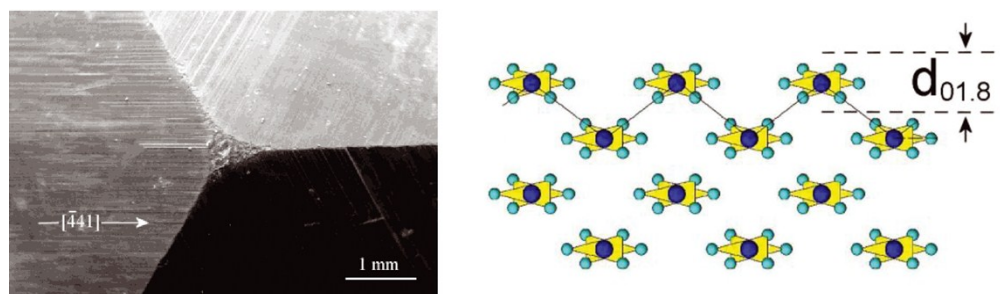

**Fig. 5 (Left side):** Striations that characterize the  $\langle -441 \rangle$  stepped profile of  $\{01.8\}$  surfaces of natural samples. (Right side): The character of this form is stepped since no bond exists between the  $\langle -441 \rangle$  PBCs (viewed up-down) within a  $d_{01.8}$  slice. Figures 3, 4 and 5 have been adapted with permission from "2D-epitaxy of lithium carbonate inducing growth

*mechanism transitions on {00.1}-K and {01.8}-S forms of calcite crystals” by L. Pastero, D. Aquilano, E. Costa, M. Rubbo; Journal of Crystal Growth 275, issue 1–2 (2005), e-1625 e-1630. Copyright C\_2005, Elsevier.*

As a matter of fact, new lattice coincidences are found (Table 1) between  $\text{Li}_2\text{CO}_3$  and calcite when comparing the 2D mesh of the {01.8} calcite surfaces with those of the {001} and {100} forms of the  $\text{Li}_2\text{CO}_3$  structure:

From Table 1 one can see the excellent 2D-coincidences between both the {001}<sub>zabuyelite</sub> and {100}<sub>zabuyelite</sub> forms and the {01.8}<sub>calcite</sub>. It should be also remembered that {001}<sub>zab</sub> is a F form while {100}<sub>zab</sub> is a S one, as it ensues from the PBC analysis. Further, {001}<sub>zab</sub> is the most important form entering the equilibrium shape of the crystal, whilst the {100}<sub>zab</sub> is excluded owing to the high value of its surface energy. Then {001}<sub>zab</sub> seems to be favored to make epi-layers which should change the character (S→F) of the {01.8}<sub>calcite</sub>. Concerning the fit of  $d_{002}$  and  $d_{200}$  zabuyelite layers with the  $d_{01.8}$  of calcite, the related contributions to the formation of anomalous mixed crystals will be discussed later on.

**Table 1** Coincidences at the {01.8}calcite/{001}zabuyelite and {01.8}calcite/{100}zabuyelite interfaces.

|                                | Calcite {01.8} host                | Zabuyelite {001} guest     | Misfit(%) | obliquity |
|--------------------------------|------------------------------------|----------------------------|-----------|-----------|
| 2D cell vectors and length (Å) | $ [010]  = 4.989$                  | $ [010]  = 4.972$          | +0.34     | 0°        |
|                                | $2/3 \times  [010]  = 25.66$       | $3 \times  [100]  = 25.17$ | +1.95     |           |
| Layer thickness (Å)            | $d_{01.8} = 1.9125$                | $d_{002} = 2.81229$        | - 47.04   |           |
|                                | Calcite {01.8} host                | Zabuyelite {100} guest     | Misfit(%) | obliquity |
| 2D cell vectors and length (Å) | $ [010]  = 4.989$                  | $ [010]  = 4.972$          | +0.34     | 0°        |
|                                | $1/3 \times  [48\bar{1}]  = 12.83$ | $2 \times  [001]  = 12.42$ | +3.30     |           |
| Layer thickness (Å)            | $2 \times d_{01.8} = 3.825$        | $d_{200} = 3.79327$        | +0.836    |           |

**Table 2** Lattice coincidences at the {00.1}calcite/{001}zabuyelite interface.

|                                | Calcite{00.1} host | Zabuyelite {001} guest | Misfit(%) | obliquity |
|--------------------------------|--------------------|------------------------|-----------|-----------|
| 2D cell vectors and length (Å) | $ [210]  = 8.64$   | $ [100]  = 8.359$      | +3.3      | 0°        |
|                                | $ [010]  = 4.989$  | $ [010]  = 4.972$      | +0.34     |           |
| Layer thickness (Å)            | $d_{00.6} = 2.843$ | $d_{002} = 2.812$      | +1.1      |           |

Aiming at explaining the lithium effect on the appearance of both the new {00.1} and {01.8} forms of calcite, we will adopt the interpretative path proposed by the Kern’s school. At first, we will reasonably concentrate our attention on the epitaxy model (geometric and structural) of the adsorbed (001)- $\text{Li}_2\text{CO}_3$  layers on the (00.1)- $\text{CaCO}_3$  substrate.

### 3) – The epitaxial model of the interface between (001)- $\text{Li}_2\text{CO}_3$ (zabuyelite) and the substrate (00.1)- $\text{CaCO}_3$ (calcite)

The space group of calcite is R3c and its parameters (hexagonal frame, in Å), are:  $a_0 = 4.989$ , and  $c_0 = 17.06$ , while  $\text{Li}_2\text{CO}_3$ , at ambient conditions, is monoclinic (C2/c), with  $a_0 = 8.39$ ,  $b_0 = 5.00$ ,  $c_0 = 6.21$ ,  $\beta = 114.50^\circ$ . Comparing these structures, viewed along their [010] directions, one can see that their geometrical misfits are very low (Table 2).

i) This means that the *geometrical conditions* for epitaxy between the (00.1) face of calcite crystal and the  $d_{002}$  layers of lithium carbonate are largely fulfilled.

ii) Concerning the *structure of the epitaxial  $d_{002}$  layer of  $\text{Li}_2\text{CO}_3$*  it is worth outlining that the outmost  $\text{Li}^+$  ions, which should face the outmost (00.1) layer of calcite, form a perfect 2D hexagonal lattice, as it can be seen onto a projection of the  $\text{Li}_2\text{CO}_3$  structure normal to the 001 plane. Entering into details,  $\text{Li}^+$  ions lie in the origin of the 2D space group  $p6m$ , the lattice vector corresponding to  $b_{\text{Li}_2\text{CO}_3} = 4.972 \text{ \AA}$ . This lattice coincides (misfit of 0.2%) with that built by the vacant sites resulting from the second restructured layer of calcite (00.1). In other words and remembering the reconstruction of {111} NaCl surfaces, one can say that, if the outmost calcite layer contains only the 25% of  $\text{CO}_3^{2-}$  ions, in the second last one the 75% of available sites will be occupied by  $\text{Ca}^{2+}$  ions while the  $\text{Li}^+$  ions could fill the remaining ones. Hence a  $d_{002}$  layer of  $\text{Li}_2\text{CO}_3$  can be adsorbed on the (00.1)<sub>calcite</sub> face. Within this layer, three PBC's develop: the strongest one is the [010] PBC, while the two others are the  $\langle -110 \rangle$  PBC's.

The adsorbed layer behaves as a 2D crystal which imposes its own PBC's to the underlying face. In our peculiar case the strong [010] PBC of the  $\text{Li}_2\text{CO}_3$  adsorbed layer runs along the same direction of the [010] steps we observed and described above; moreover, owing to the three-fold symmetry of the (00.1) face of calcite, the adsorbed impurity shall impose three strong PBC's to the face which, in turn, transforms its character from kinked to flat (K→F transition).

#### 4) – *The third condition to be fulfilled to get an “anomalous Calcite/Zabuyelite mixed crystal”*

Another geometric concordance, even not necessary for the epitaxy to occur, is that found between the thickness of the epitaxial layers of both structures. From systematic extinction rules, the thicknesses allowed (in  $\text{\AA}$ ) are  $d_{00.6} = 2.843 \text{ \AA}$  and  $d_{002} = 2.812 \text{ \AA}$  for calcite and  $\text{Li}_2\text{CO}_3$ , respectively: then, the relative misfit does not reach +1.1%.

**Table 3** Lattice coincidences at the {10.4}calcite/{111}zabuyelite interface.

|                                             | Calcite {10.4} host               | Zabuyelite {111} guest   | Misfit(%) | obliquity    |
|---------------------------------------------|-----------------------------------|--------------------------|-----------|--------------|
| 2D cell vectors and length ( $\text{\AA}$ ) | $1/3 \times  [42\bar{1}]  = 8.11$ | $ [0\bar{1}1]  = 7.9436$ | +2.09     | $2.34^\circ$ |
|                                             | $ [020]  = 9.9792$                | $ [\bar{1}10]  = 9.7266$ | +2.6      |              |
| Layer thickness ( $\text{\AA}$ )            | $d_{10.4} = 3.043$                | $d_{111} = 3.0311$       | +0.39     |              |

Thus, the parametric coincidences (in the three space directions) between the absorbed and the adsorbing crystal phases, should be fulfilled in order an *anomalous Calcite/Zabuyelite mixed crystal* to be formed. To verify this hypothesis, i.e. to investigate whether and how lithium can be absorbed into the calcite lattice, integrated characterization techniques, such as ICP, SEM, AFM, XRPD, cathodoluminescence (CL) and EPR, have been applied to a wide population of calcite single crystals grown from solution and gels.

#### 4.1.) – *CL measurements*

These measurements take advantage of the incompatibility between the structure of Li-carbonate and the  $\text{Mn}^{2+}$  ions (present as impurity in the gel matrix) captured in it. Furthermore, it is well known that  $\text{Mn}^{2+}$  capture in carbonates shows marked CL effect since Mn-depleted sectors are frankly darker than the richer ones. From CL measurements one can argue the existence of irregular stacking sequences of  $\text{Mn}^{2+}$  rich and  $\text{Mn}^{2+}$  depleted layers within the {00.1} growth sectors of calcite and this proves, indirectly, that *lithium has been buried during growth* in the  $\text{Mn}^{2+}$  depleted layers.

#### 4.2.) – *XRPD measurements*

The 10.4 is the highest diffraction peak of calcite. In pure  $\text{CaCO}_3$  samples, the highest intensity elementary curve among the ones resulting from the decomposition (figure 6a), is located at  $d_{10.4} = 3.043 \text{ \AA}$ . With increasing  $\text{Li}^+$  amount in the growth solution, the maximum intensity progressively shifts toward lower inter-planar spacing, that is at  $d_{10.4} = 3.031 \text{ \AA}$  and  $d_{10.4} = 3.028 \text{ \AA}$  when  $\text{Li}^+/\text{Ca}^{2+} = 5$  and 25, respectively (figure 6b,c). Hence the dispersion of the maximum is not symmetric around the averaged value of the peak  $\langle d_{10.4} \rangle = 3.035 \text{ \AA}$ .

It is worth noting that the 111 peak of pure  $\text{Li}_2\text{CO}_3$  crystals occurs at  $d_{111} = 3.0311 \text{ \AA}$  and that, consequently, the presence of mixed  $\text{CaCO}_3$ - $\text{Li}_2\text{CO}_3$  layers in the  $\{10.4\}$  growth sectors of calcite should affect the position of the maximum corresponding to the  $d_{10.4}$  peak. As a matter of fact, a new relationship can be obtained at the  $\{10.4\}_{\text{calcite}}/\{111\}_{\text{zabuyelite}}$  epitaxial interface, as illustrated in the following Table 3 and in figure 7.

From figure 7 it follows that an elementary  $d_{\text{zabuyelite } 111}$  slice can only grow through 1D-nucleation of uncorrelated [110] chains and then their adsorption on the  $\{10.4\}$  form of calcite is less favored with respect to that of 2D-nuclei of zabuyelite (of thickness  $d_{002}$ ) on the  $\{00.1\}_{\text{calcite}}$  pinacoid. Nevertheless, if the adsorption occurs, 1D zabuyelite chains can be easily buried within the  $\{10.4\}$  growth sectors by new freshly created calcite layers, owing to the quasi perfect coincidence between the layers thicknesses of the two crystals. This seems to be the most reasonable way of explaining the progressive shift of the highest intensity component of the 10.4 diffraction peak (and hence of the lowering of the  $d_{10.4}$  value) of our crystals, with the increasing lithium concentration in the growth solution.

The 00.6 diffraction peak is an important one, its intensity being 73/100 of the 10.4 reference peak. Its decomposition (figure 6d,e,f) yields a unique averaged value  $\langle d_{00.6} \rangle = 2.847 \text{ \AA}$ , corresponding to  $c_0 = 17.080 \text{ \AA}$  which is very close to the value of  $17.073 \text{ \AA}$  calculated from the overall XRPD spectra in non-lithium bearing calcite crystals. But, when the  $\text{Li}^+$  amount increases in the growth solution, the peak shape dramatically changes and the spacing coming out from the decomposition spreads over a  $\langle d_{00.6} \rangle$  interval of  $0.169 \text{ \AA}$ , resulting in a fairly symmetrical peak dispersion around  $\langle d_{00.6} \rangle$ .

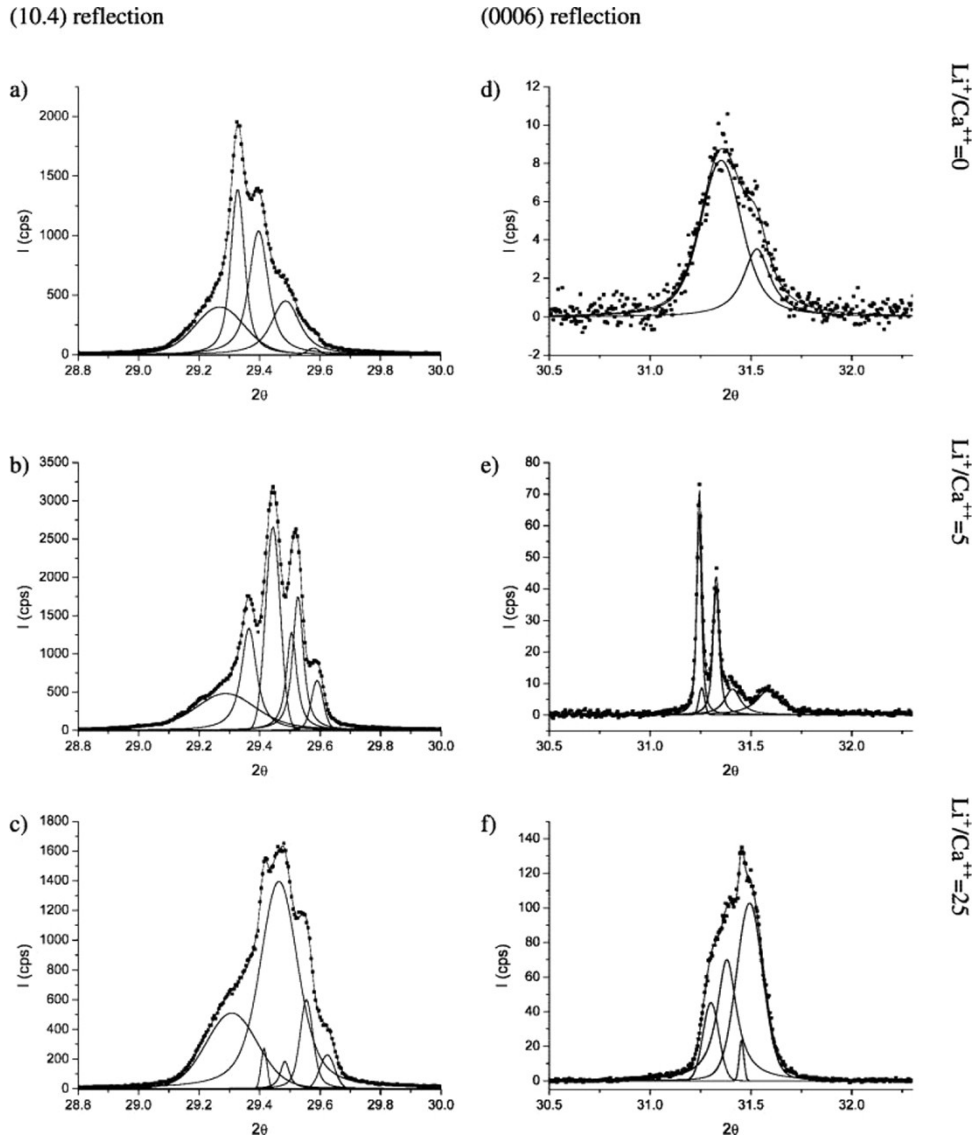

**Fig. 6** In pure  $\text{CaCO}_3$  samples (a) the highest elementary curve is located at  $d_{10.4} = 3.043 \text{ \AA}$ . With increasing  $\text{Li}^+$  amount in the growth solution, the maximum progressively shifts toward lower spacing, that is at  $d_{10.4} = 3.031 \text{ \AA}$  and  $d_{10.4} = 3.028 \text{ \AA}$  when  $\text{Li}^+/\text{Ca}^{2+} = 5$  and  $25$ , respectively (b,c). This is due to the overlapping of the  $\text{Li}_2\text{CO}_3$  layers of thickness  $d_{111} = 3.0311 \text{ \AA}$  in the  $\{10.4\}$  growth sectors of calcite. An analogous behavior is illustrated for the 00.6 peak of calcite (d-f) which is strongly affected by the overlapping of the absorbed  $\text{Li}_2\text{CO}_3$  crystal layers of thickness  $d_{00.2}$ .

All this further proves that:

- i)  $\text{Li}^+$  ions are absorbed in calcite taking the structure of zabuyelite layers and mainly locate in the  $\{00.1\}$  growth sectors of calcite, so perturbing the ordered stacking of its  $d_{00.6}$  layers. This should induce zones of compression and distension that reflect in the spreading of the parameter  $c_0$  from  $16.985$  to  $17.154 \text{ \AA}$  (being  $c_0$ , in pure calcite crystals, equal to  $17.073 \text{ \AA}$ ).
- ii) Another growth sector affected by lithium absorption, even if to a lesser extent, is that of the  $\{10.4\}$  rhombohedron. This is not surprising, since we already observed that pure calcite seeds, originally limited only by the  $\{10.4\}$  form, are encompassed by thick growth layers which start to grow from the new generated  $\{00.1\}$  form, when lithium is added to the growth solution (see the preceding figure 4).

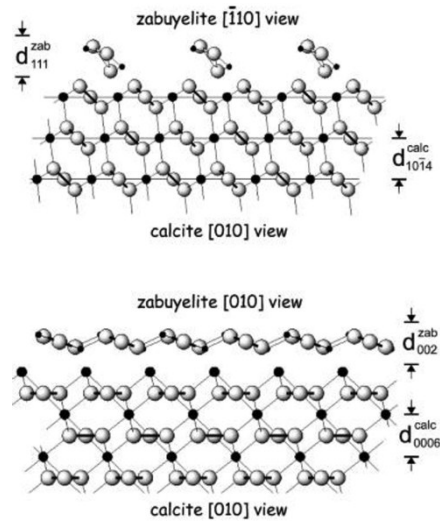

**Fig.7** Projections of calcite and  $\text{Li}_2\text{CO}_3$  (zabuyelite). Large and small spheres represent calcium and lithium atoms, respectively

(Top): The structure of the  $\{10.4\}$  calcite/ $\{111\}$  zabuyelite interface: the  $\{111\}$  form of zabuyelite is a stepped one, since any bond can be found among adjacent  $[110]$  PBCs of zabuyelite within a  $d_{111}$  slice.

(Bottom): The structure of the  $\{00.1\}$  calcite/ $\{001\}$  zabuyelite interface. The thickness of the elementary layers are near the same in both structures,  $d_{00.6}$  (calcite) being practically equal to  $d_{002}$  ( $\text{Li}_2\text{CO}_3$ ). Figures 6 and 7 are reprinted with permission from: “ $\text{CaCO}_3$  (calcite)/  $\text{Li}_2\text{CO}_3$  (zabuyelite) anomalous mixed crystals. Sector zoning and growth mechanisms” by L. Pastero, D. Aquilano; *Crystal Growth & Design* 8, issue 9 (2008), 3451–3460. Copyright C\_2008, American Chemical Society.

### 5) – A first tentative conclusion

Summing up:

- i) The incorporation of lithium into calcite crystals does not randomly occur, but needs an epitaxial mediation. This means that 2D coincidence lattices between lithium and calcium carbonates (so different in symmetry, but so close as concerns the structural packing) are not limited to a geometrical meaning but represent the necessary condition for lithium to be incorporated through the epitaxial adsorption of PBCs (1D) or islands (2D).
- ii) Adsorption is followed by the absorption into growing calcite crystals, owing to the strong similarity between the thickness of the adsorbed elementary layers and those of the underlying reactive substrate.
- iii) Thus, the anomalous mixed crystal originates thanks to a selective mechanism, since the probability of lithium entering the calcite lattice varies from  $\{00.1\}$  to  $\{10.4\}$  growth sectors, the first one being largely favored, as it ensues from the contrast shown by cathodoluminescence imaging.
- iv) On this ground, the anomalous calcite/zabuyelite mixed crystals, in the sense of Johnsen and Neuhaus, are not homogeneous, as proved by the cathodoluminescence and the different spreading of the 00.1 and 10.4 XRPD peaks.



## B. Halite (NaCl) crystallizing in the presence of formamide (H-CO-NH<sub>2</sub>)

1) -  $\{100\} \rightarrow \{111\}$  morphological change in NaCl crystals growing from aqueous solutions in the presence of formamide. The literature data.

The following Figure 1. S.I. (top) was originally drawn by Bienfait, Boistelle and Kern, in “Adsorption et Croissance Cristalline- Colloques Internationaux du CNRS”, 1952, Ed. CNRS-Paris. Figure 1. S.I. (bottom) shows the morphology of NaCl grown from pure aqueous solution and from water+formamide (20%) solution evaporating at 25 °C.

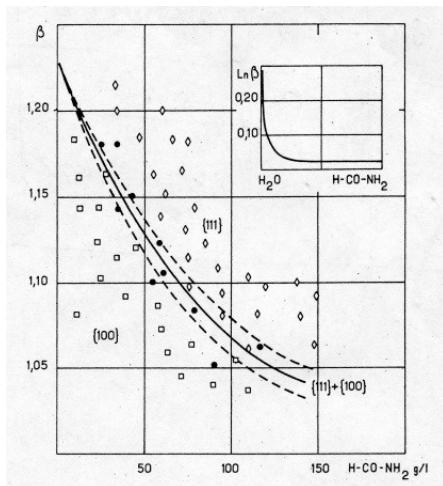

Fig.1S.I.

(top)- Morphodrome of NaCl crystals grown from aqueous solutions in the presence of formamide (concentrations on the x-axis); on the y-axis, the initial supersaturation of the solution with respect to NaCl. In the inset: the morphodrome represents the situation comprised between the limiting cases of pure water and pure formamide solutions.

(bottom, from left to right):  $\{100\}$  form from pure aqueous solution;  $\{100\}+\{111\}$  forms from aqueous containing 20% of formamide, obtained by evaporation at 25°C; a macrostep spreading on the  $\{111\}$  form (detail of the preceding case); only the  $\{111\}$  form occurs when crystals grow from pure formamide solutions.

Reprinted and adapted with permission from: “Selective adsorption/absorption of formamide in NaCl crystals growing from solution” by L. Pastero, D. Aquilano, M. Moret; *Crystal Growth & Design* 12, issue 5 (2012) 2306-2314. Copyright ©2012, American Chemical Society.

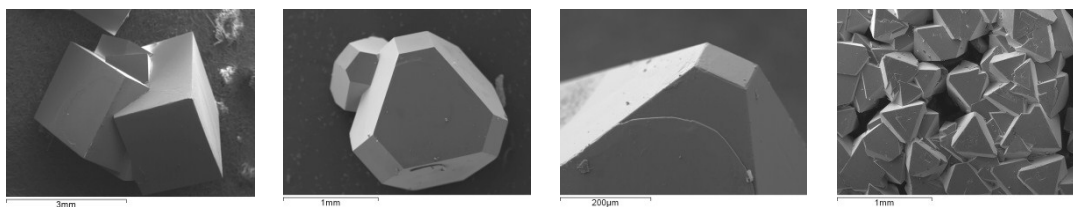

In the belief that such a dramatic change of morphology might be hardly interpreted in the light of the sole interactions between isolated molecules and the crystal surface, we investigated the structure of formamide, hoping to find if any cooperative effect (such as the epitaxial relationships) can set up between the crystal structures of NaCl (host phase) and formamide (guest phase). To do this, we started from the structure of formamide.

### 2) - The structure of formamide

At the temperature of 223 K, formamide is monoclinic (S.G.  $P2_1/n$ ), its lattice parameters being:  $a_0=3.69 \text{ \AA}$ ,  $b_0=9.18 \text{ \AA}$ ,  $c_0=6.87 \text{ \AA}$ ,  $\beta=98^\circ$ . Its structure can be viewed as made by adjacent sheets of molecules which are parallel to the 101 plane and separated by the distance  $d_{101}$  which reaches the value of  $3.09 \text{ \AA}$  at  $0^\circ\text{C}$ , just below the melting point ( $+2^\circ\text{C}$ ), at room pressure (see table 1. S.I.). Within the sheets, pairs of molecules associate to form almost coplanar dimers. Puckering of the sheets results from the tilt of the bimolecular units relative to one another. N-H...O bonds of two types cross-link the chains forming each sheet: H-bonds ( $\alpha$ ),  $2.93 \text{ \AA}$  nm long, link monomers to form dimers, while H-bonds ( $\beta$ ),  $2.88 \text{ \AA}$  nm long, link

dimers together. In the light of the Hartman-Perdok theory, one can say that two PBCs run within the layers of thickness  $d_{101}$ : the PBC [010], developing along the screw  $A_2$  axis through  $\alpha$  -bonds and the PBC  $[11\bar{1}]$  made by  $\beta$ -bonds. Remembering that no H-bonds can be found outside the  $d_{101}$  layers, one can consider the (101) pinacoid as the most important F form of the crystal and then that the theoretical crystal habit ( at least from vapor phase) should be  $\{101\}$  platy. This is the main reason why we chose the 101 plane as the best candidate for a hypothetical epitaxy between a  $d_{101}$  layer of formamide and the growing NaCl- $\{111\}$  form.

|                        | <i>NaCl</i> $\{111\}$ -Host | <i>formamide</i><br>$\{101\}$ - Guest | misfit % | obliquity |
|------------------------|-----------------------------|---------------------------------------|----------|-----------|
| 2D cell vectors<br>(Å) | $ [11\bar{2}]  = 13.81$     | $3/2  [010]  = 13.84959$              | -0.286   | 0°        |
|                        | $ [1\bar{1}0]  = 7.976$     | $ [10\bar{1}]  = 8.16682$             | -2.392   |           |
| layer thickness<br>(Å) | $d_{111} = 3.25$            | $d_{101} = 3.0947$                    | + 4.778  | -----     |

**Table 1 S.I.** Coincidences at the  $\{111\}_{NaCl}/\{101\}_{formamide}$  interface. Structural data are extrapolated at  $T = 0^\circ C$ , from formamide structures determined at 90 K, 108K and 223 K, respectively

From Table 1 one can be aware of a striking 2D-lattice coincidence that may set up at the  $\{111\}_{NaCl}/\{101\}_{formamide}$  interface and between the thickness of the elementary  $d_{111}^{NaCl}$  and  $d_{101}^{formamide}$  layers. All this means that it is worth searching for prove the existence of NaCl / formamide anomalous mixed crystals.

### 3) - The $\{100\} \rightarrow \{111\}$ NaCl morphological change due to formamide ad-sorption and its selective ab-sorption in the bulk of the NaCl lattice

Starting from the experience acquired in the formation of the calcite/zabuyelite anomalous mixed crystals, we did not confine our attention to the morphology of the NaCl crystals grown in the presence of formamide, but investigated also their bulk structure, in order to find if the adsorption  $\rightarrow$  absorption mechanism would also occur in this new case. Fig.2 S.I. shows the XRPD spectra recorded on different populations of NaCl crystals obtained at different crystallization temperature ( $T_c$ ) and from solutions containing different concentrations of formamide ( $C_f$ ). Two main ( $2\theta$ ) intervals, corresponding to the  $d_{111}$  and  $d_{002}$  equidistances of the NaCl crystal are worthy of consideration.

#### (a) $27^\circ \leq 2\theta \leq 28^\circ \rightarrow$ the coexistence of $111_{NaCl}$ and the $101_{formamide}$ reflections

$i_{(111)}$  A saturated ( $T_s=95^\circ C$ ) NaCl aqueous solution ( $C_f=20\%$ ) was cooled, under a gradient of  $20^\circ/h$ , at  $-5^\circ C$ . XRPD spectra were carried out at  $T=-5^\circ C$  as well, on a large population of un-grinded as grown  $\{111\}$  platy shaped crystals. Fig.12a, left side shows two diffraction peaks. The first one, at lower  $2\theta$  values, corresponds to the integrated  $\lambda_{K\alpha 1}$  and  $\lambda_{K\alpha 2}$  contributions of the reflection  $\langle d_{111}^{NaCl} \rangle = 3.2593 \text{ \AA}$ . The second one, i.e. the low intensity peak at  $2\theta = 27.695$ , cannot be indexed as a NaCl reflection but as the  $d_{101}^{formamide} = 3.2209 \text{ \AA}$  (using the averaged  $\lambda_{K\alpha 1,2} = 1.54178 \text{ \AA}$ ). This  $d_{101}^{formamide}$  value is slightly higher (+4.07%) than the calculated one ( $3.0947 \text{ \AA}$ ) by extrapolation of structural data of the pure formamide. This means that NaCl crystals were able to capture formamide in their bulk during growth (either through fluid inclusions or by absorption of ordered  $d_{101}$  layers, or both). Since these spectra were obtained at  $T=-5^\circ C$ , where formamide is necessarily crystallized, other measurements must be made at  $T \geq +2^\circ C$ , i.e. beyond its melting point. Therefore, all the experiments described in the following were performed by evaporating a solution ( $T_{ev}=30^\circ C$ ) and the corresponding XRPD spectra were carried out at  $T=+25^\circ C$ .

**ii<sub>(111)</sub>** NaCl crystals formed from a water/formamide solution ( $C_f = 20\%$ ). Their morphology is made by dominating  $\{100\}$  and small  $\{111\}$  forms. The  $111_{\text{NaCl}}$  peak is weakly asymmetric (due to the  $\lambda_{K\alpha 1}$  and  $\lambda_{K\alpha 2}$  components) and yields  $\langle d_{111}^{\text{NaCl}} \rangle = 3.2604 \text{ \AA}$ . No other peak occurs in the observed  $2\theta$  range. (Fig.2b, left side) The small increase (+0.033%) of the  $d_{111}^{\text{NaCl}}$  value is not surprising, owing to the increased temperature of measurement (from  $-5$  to  $+25^\circ\text{C}$ ). However, no adsorbed  $d_{101}^{\text{formamide}}$  layers are found to be orderly *ab*-sorbed in the growing NaCl crystal.

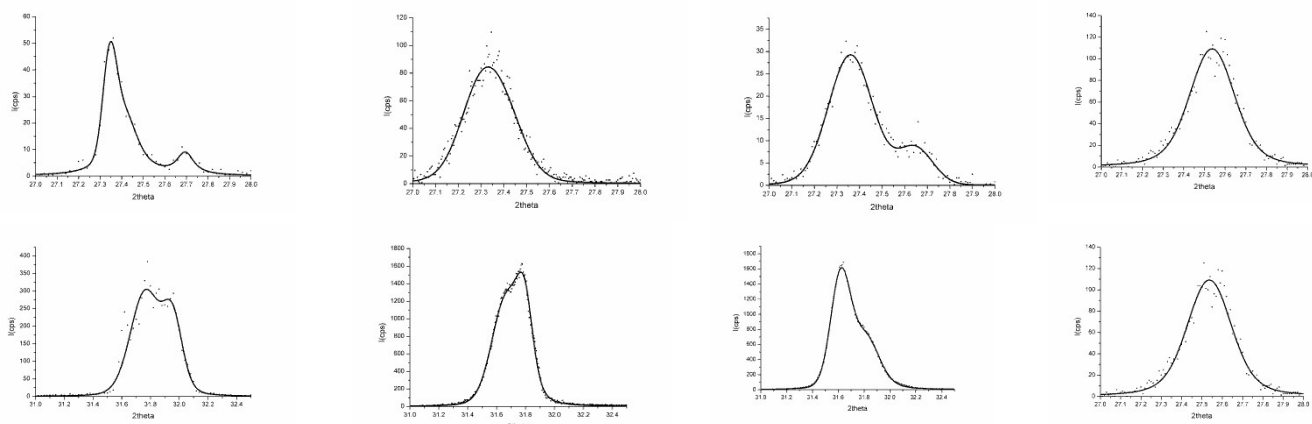

**Fig.2 S.I.** a: XRPD spectra performed at  $T = -5^\circ\text{C}$  on crystals obtained at  $T_{\text{cr}} = -5^\circ\text{C}$  from a NaCl aqueous solution ( $T_s = 95^\circ\text{C}$ ;  $C_f = 20\%$ ) cooled under a gradient of  $20^\circ/\text{h}$ . Top:  $111_{\text{NaCl}}$  peak (lower angle) +  $101_{\text{formamide}}$  peak (higher angle).

Bottom:  $002_{\text{NaCl}}$  peak

b: spectra performed at  $T = 25^\circ\text{C}$  on crystals obtained by evaporation at  $T_{\text{cr}} = 30^\circ\text{C}$  from a NaCl aqueous solution (initial  $C_f = 20\%$ ). Top: asymmetric  $111_{\text{NaCl}}$  peak (lower angle).

Bottom:  $002_{\text{NaCl}}$  peak

c: spectra performed at  $T = 25^\circ\text{C}$  on crystals obtained by evaporation at  $T_{\text{cr}} = 30^\circ\text{C}$  from a NaCl aqueous solution (initial  $C_f = 60\%$ ). Top: asymmetric  $111_{\text{NaCl}}$  peak (lower angle).

Bottom:  $002_{\text{NaCl}}$  peak

d: spectra performed at  $T = 25^\circ\text{C}$  on crystals obtained by evaporation at  $T_{\text{cr}} = 30^\circ\text{C}$  from a NaCl pure formamide solution ( $C_f = 100\%$ ). Top:  $111_{\text{NaCl}}$  peak.

Bottom:  $002_{\text{NaCl}}$  peak

*Reprinted and adapted with permission from: "Selective adsorption/absorption of formamide in NaCl crystals growing from solution" by L. Pastero, D. Aquilano, M. Moret; Crystal Growth & Design 12, issue 5 (2012) 2306-2314. Copyright ©2012, American Chemical Society.*

**iii<sub>(111)</sub>** NaCl crystals were obtained from a new water/formamide solution ( $C_f = 60\%$ ). Their morphology is now made by dominating  $\{111\}$  and small  $\{100\}$  forms. The full width at mean height (FWMH) of the  $111_{\text{NaCl}}$  peak ( $\langle d_{111}^{\text{NaCl}} \rangle = 3.2596 \text{ \AA}$ ) increases with respect to the preceding case. A satellite peak occurs at  $2\theta = 27.650$  and corresponds to  $d_{101}^{\text{formamide}} = 3.226 \text{ \AA}$  (Fig.12c, left side). Any effect of crystallization of formamide fluid inclusions must be excluded since both the crystallization and recording temperatures were largely higher than the melting point of formamide. Then, when the concentration of formamide competes with that of water, the  $d_{101}^{\text{formamide}}$  layers are not only epitaxially adsorbed on the  $111_{\text{NaCl}}$  surface but also buried in the growing crystal.

**iv<sub>(111)</sub>** The just mentioned conclusion is spectacularly confirmed by NaCl crystals obtained from pure formamide solution. The only form is the  $\{111\}$  octahedron. XRPD spectra yielded a unique and symmetric peak which locates in between the  $111_{\text{NaCl}}$  and the  $101_{\text{formamide}}$  peaks. (Fig.2d, left side) Thus, as a first approximation,  $d_{111\text{NaCl}}^{101\text{formamide}} = 3.2393 \text{ \AA}$ .

**(b)  $31^\circ \leq 2\theta \leq 32.5^\circ \rightarrow$  the  $002_{(\text{NaCl})}$  reflection**

The behaviour of the  $002_{(\text{NaCl})}$  reflection is rather different with respect to the preceding one. In the  $31^\circ \leq 2\theta \leq 32.5^\circ$  interval there is no risk of overlapping between the  $002_{(\text{NaCl})}$  peak and formamide reflections. Nevertheless both the  $d_{002}^{\text{NaCl}}$  value and the corresponding peak profile are affected by the formamide layers absorbed in the crystal within the  $\{111\}$  growth sectors. In the following we will illustrate the behaviour of the  $002_{(\text{NaCl})}$  peak, analogous of the just described situations (from  $\mathbf{i}_{111}$  to  $\mathbf{iv}_{111}$ ):

**i<sub>(002)</sub>**  $C_f = 20\%$ ;  $T_{\text{crystallization}} = -5^\circ\text{C}$ ; XRPD spectra were performed at  $T = -5^\circ\text{C}$ , as in  $\mathbf{i}_{(111)}$ . A large peak is obtained, its complex profile being composed by three different contributions (Fig.2a,right side): a low angle component due to  $d_{002}^{\text{NaCl}} = 2.827 \text{ \AA}$ , a medium angle component located at  $d_{002}^{\text{NaCl}} = 2.8137 \text{ \AA}$  and a high angle component at  $d_{002}^{\text{NaCl}} = 2.7974 \text{ \AA}$ . The averaged value of these spacing locates at  $d_{002}^{\text{NaCl}} \text{ averaged} = 2.8127 \text{ \AA}$  which is  $-0.35\%$  lower than the corresponding value calculated from the reflection  $\langle d_{111}^{\text{NaCl}} \rangle = 3.2593 \text{ \AA}$  observed in  $\mathbf{i}_{111}$ . This is not surprising if one remembers that the  $\{111\}$  platy shape of the crystals obtained in this case favors the dispersion of the  $d_{002}^{\text{NaCl}}$  spacing owing to the varying amount of formamide captured within the  $d_{111}^{\text{NaCl}}$  layers in the  $+95^\circ\text{C} \rightarrow -5^\circ\text{C}$  growth interval.

**ii<sub>(002)</sub>**  $C_f = 20\%$ ,  $T_{\text{ev}} = 30^\circ\text{C} \rightarrow$  The 002 peak profile is asymmetric (Fig. 2b,right side): from the lower angle component the averaged value ( $\lambda_{K\alpha_{1,2}}$ ) results to be  $\langle d_{001} \rangle_{\text{lower angle}} = 5.6515 \text{ \AA}$  which only differs by  $-0.033\%$  from the calculated  $\langle d_{001} \rangle = 5.6534 \text{ \AA}$  obtained from the measured  $\langle d_{111} \rangle = 3.2604 \text{ \AA}$  (as it can be seen in  $\mathbf{ii}_{111}$ ). Further, the averaged value of the higher angle component of the asymmetric peak locates at  $\langle d_{001} \rangle_{\text{higher angle}} = 5.6288 \text{ \AA}$ , so showing that within the same crystal population there are two generations of  $\langle d_{001} \rangle$  equidistances, which are differently affected by the capture of  $d_{101}$  ordered layers of formamide. In this case, the split of  $\langle d_{001} \rangle = (\langle d_{001} \rangle_{\text{lower angle}} - \langle d_{001} \rangle_{\text{higher angle}})$  is  $0.0227 \text{ \AA}$

**iii<sub>(002)</sub>**  $C_f = 60\%$ ,  $T_{\text{ev}} = 30^\circ\text{C} \rightarrow$  The 002 peak profile maintains asymmetric, but its shape changes, due to the displacement of its two components (Fig.12c,right side). From measurement:  $\langle d_{001} \rangle_{\text{lower angle}} = 5.6603 \text{ \AA}$  while  $\langle d_{001} \rangle_{\text{higher angle}} = 5.6262 \text{ \AA}$   $\rightarrow$  the split reaches  $0.0341 \text{ \AA}$ . The variation in the splitting of the two components of the  $002_{\text{NaCl}}$  peak confirms that the increase of the formamide concentration in solution enhances as well the relative importance of the  $\{111\}$  surfaces and, ultimately, of the  $\{111\}$  growth sectors which are affected by the presence of absorbed layers of formamide. This, in turn, influences the value of the  $\langle d_{001} \rangle$  equidistance, according to relative portion of the  $\{111\}$  growth sectors which are intersected by the 001 lattice planes.

**iv<sub>(002)</sub>**  $C_f = 100\%$ ,  $T_{\text{ev}} = 30^\circ\text{C} \rightarrow$  As for the 111 peak, the shape of the 002 reflection, located at  $\langle d_{001} \rangle = 5.6238 \text{ \AA}$  becomes symmetric (Fig.12d,right side). Compared with the corresponding  $\langle d_{001} \rangle = 5.6106 \text{ \AA}$  value, calculated from the measured 111 peak obtained under the same growth condition (see  $\mathbf{iv}_{111}$ ), its deviation does not exceed  $-0.23\%$ .

Summing up, from the detailed XRPD spectra carried out on the as grown NaCl crystals obtained in the presence of varying concentrations of formamide and having considered the related changes of their growth morphology, one can say:

a) – formamide easily adsorbs on the  $\{111\}_{\text{NaCl}}$  surfaces, so generating the morphological transition:  $\{100\} \rightarrow \{100\} + \{111\}$ . This change was attributed to the adsorption of isolated formamide molecules on the  $\{111\}$  surfaces. Through the observation of macrostep spreading on the  $\{111\}$  surfaces we found that formamide induces a K  $\rightarrow$  F change in the character of the  $\{111\}$  form and, searching for lattice coincidences, we put forward the hypothesis of a 2D epitaxy setting up between the  $101_{\text{formamide}}$  lattice planes and the  $\{111\}_{\text{NaCl}}$  surfaces. Hence, the most reasonable model of formamide adsorption is not “random-molecular” but “2D-epitaxial islands”.

b) – The thickness of the epitaxially adsorbed  $d_{101}^{\text{formamide}}$  layers fits very well ( $\Delta d < 5\%$ ) with the height of the elementary  $d_{111}$  steps of NaCl crystals. Hence, one can reasonably suppose that the adsorbed layers can be easily buried in the  $\{111\}_{\text{NaCl}}$  sectors during growth.

c) – XRPD spectra carried out on as grown NaCl crystal populations, under different temperature of crystallization and formamide concentration ( $C_f$ ) in aqueous solutions, evidenced that the 111 and 002 reflections of NaCl are profoundly and differently modified according to both temperature and ( $C_f$ ) value, the main factor of change being the relative size of the “formamide contaminated”  $\{111\}_{\text{NaCl}}$  growth sectors. This unambiguously proves our hypothesis put forward in (b).

d) – When NaCl crystals nucleate and grow from pure formamide solution, XRPD spectra indicate that only the  $\{111\}$  growth sectors exist in the crystals.

**Figure ESI\_1:** The alternative coincidence cell between  $\{111\}$ - NaF (left side) and  $\{101\}$ - formamide (right side), as illustrated in Table ESI\_1a

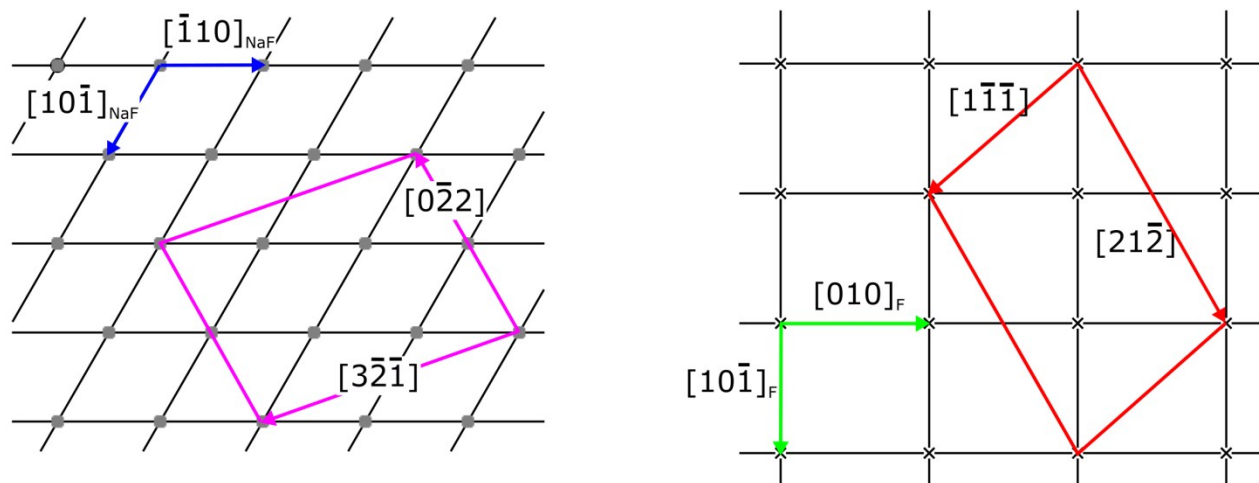

**Table ESI\_1.** The coincidence lattices between formamide and the alkali halides in the “NaF mode” (a comparison between *LiF*, *NaF* and *LiCl*)

|                            | Host crystal                                            | Guest crystal                                             | Misfit $m$ (%)  | Notes                                        |
|----------------------------|---------------------------------------------------------|-----------------------------------------------------------|-----------------|----------------------------------------------|
|                            | <b>LiF <math>\{111\}</math></b>                         | <b>formamide <math>\{101\}</math></b>                     |                 |                                              |
| <b>2D-cell vectors</b>     | $[2\bar{3}1] = 15.0675$<br>$[2\bar{1}\bar{1}] = 9.8640$ | $2 \times [10\bar{1}] = 16.165$<br>$[11\bar{1}] = 12.296$ | +7.28<br>+24.66 | Low linear misfit<br>Very high linear misfit |
| <b>2D-cell Area</b>        | <b>112.35</b>                                           | 149.804                                                   | <b>+33.33</b>   | Very high area misfit                        |
| <b>Layer thickness (Å)</b> | $4 \times d_{111} = 9.299$                              | $3 \times d_{101} = 9.399$                                | <b>+1.065</b>   | Good compatibility for 2D absorption         |
|                            | <b>NaF <math>\{111\}</math></b>                         | <b>formamide <math>\{101\}</math></b>                     |                 |                                              |
| <b>2D-cell vectors</b>     | $[2\bar{3}1] = 17.337$<br>$[2\bar{1}\bar{1}] = 11.350$  | $2 \times [10\bar{1}] = 16.165$<br>$[11\bar{1}] = 12.296$ | -7.25<br>+8.34  | Low and opposite linear misfits              |
| <b>2D-cell Area</b>        | 148.754                                                 | 149.804                                                   | <b>+ 0.70</b>   | Very low area misfit                         |
| <b>Layer thickness</b>     | $5 \times d_{111} = 13.38$                              | $4 \times d_{101} = 12.53$                                | - 6.74          | Low compatibility for 2D                     |

| (Å)                        |                              |                                 |               | absorption                           |
|----------------------------|------------------------------|---------------------------------|---------------|--------------------------------------|
|                            | <b>LiCl {111}</b>            | <b>formamide {101}</b>          |               |                                      |
| <b>2D-cell vectors</b>     | $[2\bar{3}1] = 19.232$       | $2 \times [10\bar{1}] = 16.165$ | <b>-18.97</b> | Very high linear misfit              |
|                            | $[2\bar{1}\bar{1}] = 12.590$ | $[11\bar{1}] = 12.296$          | -2.39         | Low linear misfit                    |
| <b>2D-cell Area</b>        | 183.04                       | 149.804                         | <b>-22.18</b> | Very high area misfit                |
| <b>Layer thickness (Å)</b> | $d_{111} = 2.968$            | $d_{101} = 3.133$               | +5.57         | Good compatibility for 2D absorption |

**Table ESI\_1a:** The alternative coincidence cell between NaF and formamide

|                        | <b>NaF {111}</b>             | <b>formamide {101}</b>       |               | Notes                                                          |
|------------------------|------------------------------|------------------------------|---------------|----------------------------------------------------------------|
| <b>2D-cell vectors</b> | $[0\bar{2}2] = 13.106$       | $[1\bar{1}\bar{1}] = 12.297$ | -6.58         | Low and opposite linear misfits                                |
|                        | $[3\bar{2}\bar{1}] = 17.338$ | $[21\bar{2}] = 18.633$       | +7.47         |                                                                |
| <b>2D-cell Area</b>    | 223.132                      | 224.706                      | <b>+ 0.70</b> | Very low area misfit and multiplicity = 6× NaF {111} unit cell |

**Table ESI\_2.** The coincidence lattices between formamide and the alkali halides in the “NaCl mode” (a comparison between *LiCl*, *KF*, *LiBr*, *NaCl*, *RbF*, *NaBr*, *CsF*, *LiI* and *KCl*)

|                            | <b>Host crystal</b>             | <b>Guest crystal</b>      | <b>Misfit <i>m</i> (%)</b> | <b>Notes</b>                         |
|----------------------------|---------------------------------|---------------------------|----------------------------|--------------------------------------|
|                            | <b>LiCl {111}</b>               | <b>formamide {101}</b>    |                            |                                      |
| <b>2D-cell vectors</b>     | $2 \times [11\bar{2}] = 25.181$ | $3 \times [010] = 27.802$ | + 10.41                    | Medium-high linear misfits           |
|                            | $[1\bar{1}0] = 7.269$           | $[10\bar{1}] = 8.083$     | +11.20                     |                                      |
| <b>2D-cell Area</b>        | <b>183.037</b>                  | 224.723                   | <b>+22.77</b>              | Very high area misfit                |
| <b>Layer thickness (Å)</b> | 2.967                           | $d_{101} = 3.133$         | +5.57                      | Good compatibility for 2D absorption |
|                            | <b>KF {111}</b>                 | <b>formamide {101}</b>    |                            |                                      |
| <b>2D-cell vectors</b>     | $2 \times [11\bar{2}] = 26.192$ | $3 \times [010] = 27.802$ | + 6.146                    | Low and cooperating linear misfits   |

|                            |                                                          |                                                    |                   |                                           |
|----------------------------|----------------------------------------------------------|----------------------------------------------------|-------------------|-------------------------------------------|
|                            | $[1\bar{1}0]= 7.561$                                     | $[10\bar{1}]= 8.083$                               | +6.904            |                                           |
| <b>2D-cell Area</b>        | <b>198.038</b>                                           | 224.723                                            | <b>+13.47</b>     | Medium-high area misfit                   |
| <b>Layer thickness (Å)</b> | $d_{111} = 3.087$                                        | $d_{101} = 3.133$                                  | +1.49             | Very good compatibility for 2D absorption |
|                            | <b>LiBr {111}</b>                                        | <b>formamide {101}</b>                             |                   |                                           |
| <b>2D-cell vectors</b>     | $2 \times [11\bar{2}] = 26.947$<br>$[1\bar{1}0] = 7.779$ | $3 \times [010] = 27.802$<br>$[10\bar{1}] = 8.083$ | + 3.172<br>+3.907 | Low and cooperating linear misfits        |
| <b>2D-cell Area</b>        | <b>209.622</b>                                           | 224.723                                            | <b>+7.204</b>     | Low area misfit                           |
| <b>Layer thickness (Å)</b> | $d_{111} = 3.176$                                        | $d_{101} = 3.133$                                  | - 1.37            | Very good compatibility for 2D absorption |
|                            | <b>NaCl {111}</b>                                        | <b>formamide {101}</b>                             |                   |                                           |
| <b>2D-cell vectors</b>     | $2 \times [11\bar{2}] = 27.632$<br>$[1\bar{1}0] = 7.976$ | $3 \times [010] = 27.802$<br>$[10\bar{1}] = 8.083$ | + 0.62<br>+1.68   | Very low and cooperating linear misfits   |
| <b>2D-cell Area</b>        | 220.393                                                  | 224.723                                            | <b>+ 1.96</b>     | Very low area misfit                      |
| <b>Layer thickness (Å)</b> | $d_{111} = 3.256$                                        | $d_{101} = 3.133$                                  | - 3.92            | Very good compatibility for 2D absorption |
|                            | <b>RbF {111}</b>                                         | <b>formamide {101}</b>                             |                   |                                           |
| <b>2D-cell vectors</b>     | $2 \times [11\bar{2}] = 27.688$<br>$[1\bar{1}0] = 7.993$ | $3 \times [010] = 27.802$<br>$[10\bar{1}] = 8.083$ | + 0.41<br>+1.126  | Very low and cooperating linear misfits   |
| <b>2D-cell Area</b>        | 221.314                                                  | 224.723                                            | <b>+1.538</b>     | Very low area misfit                      |
| <b>Layer thickness (Å)</b> | $d_{111} = 3.263$                                        | $d_{101} = 3.133$                                  | - 3.99            | Very good compatibility for 2D absorption |
|                            | <b>NaBr {111}</b>                                        | <b>formamide {101}</b>                             |                   |                                           |
| <b>2D-cell vectors</b>     | $2 \times [11\bar{2}] = 29.282$<br>$[1\bar{1}0] = 8.453$ | $3 \times [010] = 27.802$<br>$[10\bar{1}] = 8.083$ | -5.32<br>-4.58    | Low and cooperating linear misfits        |
| <b>2D-cell Area</b>        | 247.52                                                   | 224.723                                            | <b>- 10.14</b>    | Medium-high area misfit                   |
| <b>Layer thickness (Å)</b> | $d_{111} = 3.451$                                        | $d_{101} = 3.133$                                  | - 10.15           | Very low compatibility for 2D absorption  |
|                            | <b>CsF {111}</b>                                         | <b>formamide {101}</b>                             |                   |                                           |
| <b>2D-cell vectors</b>     | $2 \times [11\bar{2}] = 29.462$<br>$[1\bar{1}0] = 8.505$ | $3 \times [010] = 27.802$<br>$[10\bar{1}] = 8.083$ | - 5.97<br>- 5.22  | Low and cooperating linear misfits        |
| <b>2D-cell Area</b>        | 250.574                                                  | 224.723                                            | <b>- 11.51</b>    | Medium-high area misfit                   |

|                            |                                                           |                                                    |                    |                                            |
|----------------------------|-----------------------------------------------------------|----------------------------------------------------|--------------------|--------------------------------------------|
| <b>Layer thickness (Å)</b> | $d_{111} = 3.472$                                         | $d_{101} = 3.133$                                  | - 10.82            | Very low compatibility for 2D absorption   |
|                            | <b>LiI {111}</b>                                          | <b>formamide {101}</b>                             |                    |                                            |
| <b>2D-cell vectors</b>     | $2 \times [11\bar{2}] = 29.5072$<br>$[1\bar{1}0] = 8.518$ | $3 \times [010] = 27.802$<br>$[10\bar{1}] = 8.083$ | - 6.13<br>- 5.38   | Low and cooperating linear misfits         |
| <b>2D-cell Area</b>        | 251.342                                                   | 224.723                                            | - <b>12.04</b>     | Medium-high area misfit                    |
| <b>Layer thickness (Å)</b> | $d_{111} = 3.477$                                         | $d_{101} = 3.133$                                  | - 10.99            | Very low compatibility for 2D absorption   |
|                            | <b>KCl {111}</b>                                          | <b>formamide {101}</b>                             |                    |                                            |
| <b>2D-cell vectors</b>     | $2 \times [11\bar{2}] = 30.827$<br>$[1\bar{1}0] = 8.899$  | $3 \times [010] = 27.802$<br>$[10\bar{1}] = 8.083$ | - 10.88<br>- 10.09 | Medium-high and cooperating linear misfits |
| <b>2D-cell Area</b>        | 251.342                                                   | 224.723                                            | - <b>22.10</b>     | High area misfit                           |
| <b>Layer thickness (Å)</b> | $d_{111} = 3.633$                                         | $d_{101} = 3.133$                                  | - 15.96            | Very low compatibility for 2D absorption   |

**Table ESI\_3.** The coincidence lattices between formamide and the alkali halides in the “KBr mode” (a comparison between *LiI*, *KCl*, *NaI*, *RbCl*, *KBr*, *RbBr*, *KI* and *RbI*)

|                                     | <b>Host crystal</b>                              | <b>Guest crystal</b>                               | <b>Misfit <math>m</math> (%)</b> | <b>Notes</b>                              |
|-------------------------------------|--------------------------------------------------|----------------------------------------------------|----------------------------------|-------------------------------------------|
|                                     | <b>LiI {111}</b>                                 | <b>formamide {101}</b>                             |                                  |                                           |
| <b>2D-cell vectors (Å)</b>          | $[11\bar{2}] = 14.7536$<br>$[1\bar{1}0] = 8.518$ | $2 \times [10\bar{1}] = 16.165$<br>$[010] = 9.267$ | +9.566<br>+8.795                 | Low-medium and cooperating linear misfits |
| <b>2D-cell area (Å<sup>2</sup>)</b> | 125.671                                          | 149.801                                            | + <b>19.20</b>                   | Very high area misfit                     |
| <b>Layer thickness (Å)</b>          | $d_{111} = 3.477$                                | $d_{101} = 3.133$                                  | 10.99                            | Very low compatibility for 2D absorption  |
|                                     | <b>KCl {111}</b>                                 | <b>formamide {101}</b>                             |                                  |                                           |
| <b>2D-cell vectors (Å)</b>          | $[11\bar{2}] = 15.4135$<br>$[1\bar{1}0] = 8.899$ | $2 \times [10\bar{1}] = 16.165$<br>$[010] = 9.267$ | +4.875<br>+4.137                 | Low and cooperating linear misfits        |
| <b>2D-cell area (Å<sup>2</sup>)</b> | 137.165                                          | 149.801                                            | +9.212                           | Low-Medium area misfit                    |
| <b>Layer thickness (Å)</b>          | $5 \times d_{111} = 18.166$                      | $6 \times d_{101} = 18.798$                        | 3.48                             | Low compatibility for 2D absorption       |
|                                     | <b>NaI {111}</b>                                 | <b>formamide {101}</b>                             |                                  |                                           |
| <b>2D-cell vectors (Å)</b>          | $[11\bar{2}] = 15.855$                           | $2 \times [10\bar{1}] = 16.165$                    | +1.95                            | Low and cooperating linear misfits        |



|                                     |                                                  |                                                    |                    |                                            |
|-------------------------------------|--------------------------------------------------|----------------------------------------------------|--------------------|--------------------------------------------|
|                                     | $[1\bar{1}0] = 9.154$                            | $[010] = 9.267$                                    | +1.237             |                                            |
| <b>2D-cell area (Å<sup>2</sup>)</b> | 145.138                                          | 149.801                                            | <b>+3.21</b>       | Low area misfit                            |
| <b>Layer thickness (Å)</b>          | $4 \times d_{111} = 14.948$                      | $5 \times d_{101} = 15.665$                        | 4.80               | Medium-low compatibility for 2D absorption |
|                                     | <b>RbCl {111}</b>                                | <b>formamide {101}</b>                             |                    |                                            |
| <b>2D-cell vectors (Å)</b>          | $[11\bar{2}] = 16.120$<br>$[1\bar{1}0] = 9.307$  | $2 \times [10\bar{1}] = 16.165$<br>$[010] = 9.267$ | + 0.28<br>− 0.429  | Very low and opposite linear misfits       |
| <b>2D-cell area (Å<sup>2</sup>)</b> | 150.031                                          | 149.801                                            | <b>− 0.151</b>     | Very low area misfit                       |
| <b>Layer thickness (Å)</b>          | $4 \times d_{111} = 15.198$                      | $5 \times d_{101} = 15.665$                        | 3.07               | Low compatibility for 2D                   |
|                                     | <b>KBr {111}</b>                                 | <b>formamide {101}</b>                             |                    |                                            |
| <b>2D-cell vectors (Å)</b>          | $[11\bar{2}] = 16.167$<br>$[1\bar{1}0] = 9.334$  | $2 \times [10\bar{1}] = 16.165$<br>$[010] = 9.267$ | − 0.012<br>− 0.723 | Very low and cooperating linear misfits    |
| <b>2D-cell area (Å<sup>2</sup>)</b> | 150.902                                          | 149.801                                            | <b>− 0.735</b>     | Very low 2D cell multiplicity              |
| <b>Layer thickness (Å)</b>          | $4 \times d_{111} = 15.24$                       | $5 \times d_{101} = 15.665$                        | 2.79               | Low compatibility for 2D absorption        |
|                                     | <b>RbBr {111}</b>                                | <b>formamide {101}</b>                             |                    |                                            |
| <b>2D-cell vectors (Å)</b>          | $[11\bar{2}] = 16.8736$<br>$[1\bar{1}0] = 9.742$ | $2 \times [10\bar{1}] = 16.165$<br>$[010] = 9.267$ | − 4.38<br>− 5.12   | Low-medium and cooperating linear misfits  |
| <b>2D-cell area (Å<sup>2</sup>)</b> | 164.383                                          | 149.801                                            | <b>− 9.73</b>      | Low-Medium area misfit                     |
| <b>Layer thickness (Å)</b>          | $3 \times d_{111} = 11.932$                      | $4 \times d_{101} = 12.538$                        | 5.08               | Medium-low compatibility for 2D absorption |
|                                     | <b>KI {111}</b>                                  | <b>formamide {101}</b>                             |                    |                                            |
| <b>2D-cell vectors (Å)</b>          | $[11\bar{2}] = 17.308$<br>$[1\bar{1}0] = 9.993$  | $2 \times [10\bar{1}] = 16.165$<br>$[010] = 9.267$ | − 7.07<br>− 7.83   | Low-medium and cooperating linear misfits  |
| <b>2D-cell area (Å<sup>2</sup>)</b> | 172.962                                          | 149.801                                            | <b>− 15.46</b>     | High area misfit                           |
| <b>Layer thickness (Å)</b>          | $3 \times d_{111} = 12.238$                      | $4 \times d_{101} = 12.538$                        | 2.44               | Medium compatibility for 2D absorption     |
|                                     | <b>RbI {111}</b>                                 | <b>formamide {101}</b>                             |                    |                                            |
| <b>2D-cell vectors (Å)</b>          | $[11\bar{2}] = 17.984$<br>$[1\bar{1}0] = 10.383$ | $2 \times [10\bar{1}] = 16.165$<br>$[010] = 9.267$ | − 11.25<br>− 12.04 | High and cooperating linear misfit         |
| <b>2D-cell area (Å<sup>2</sup>)</b> | 186.728                                          | 149.801                                            | <b>− 24.65</b>     | Very high area misfit                      |
| <b>Layer thickness (Å)</b>          | $3 \times d_{111} = 12.716$                      | $4 \times d_{101} = 12.538$                        | 1.42               | Medium compatibility for                   |

|  |  |  |  |               |
|--|--|--|--|---------------|
|  |  |  |  | 2D absorption |
|--|--|--|--|---------------|

**Table ESI\_4.** The coincidence lattices between the alkali halides and the hexagonal Ice (I<sub>h</sub>) in the “NaF mode” (a comparison between *LiF*, *NaF* and *LiCl*)

|                            | Host crystal                                                 | Guest crystal                               | Misfit <i>m</i> (%) |                                            |
|----------------------------|--------------------------------------------------------------|---------------------------------------------|---------------------|--------------------------------------------|
|                            | <b>LiF {111}</b>                                             | <b>hexagonal Ice (I<sub>h</sub>) {00.1}</b> |                     |                                            |
| <b>2D-cell vectors</b>     | 2 × [10 $\bar{1}$ ] = 11.39<br>2 × [ $\bar{1}$ 10] = 11.39   | 3 × [100] = 13.539<br>3 × [010] = 13.539    | +18.87<br>+18.87    | Very high and cooperating linear misfit    |
| <b>2D-cell Area</b>        | 112.35                                                       | 158.746                                     | + <b>41.29</b>      | Very high area misfit                      |
| <b>Layer thickness (Å)</b> | 3 × d <sub>111</sub> = 6.975                                 | 2 × d <sub>00.1</sub> = 7.356               | 5.46                | Good compatibility for 2D absorption       |
|                            | <b>NaF {111}</b>                                             | <b>hexagonal Ice (I<sub>h</sub>) {00.1}</b> |                     | <b>Notes</b>                               |
| <b>2D-cell vectors</b>     | 2 × [10 $\bar{1}$ ] = 13.106<br>2 × [ $\bar{1}$ 10] = 13.106 | 3 × [100] = 13.539<br>3 × [010] = 13.539    | +3.30<br>+3.30      | Low and cooperating linear misfits         |
| <b>2D-cell Area</b>        | 148.754                                                      | 158.746                                     | + 6.72              | Low area misfit                            |
| <b>Layer thickness (Å)</b> | 3 × d <sub>111</sub> = 6.683                                 | 2 × d <sub>00.1</sub> = 7.356               | + 10.07             | Very low compatibility for 2D absorption   |
|                            | <b>LiCl {111}</b>                                            | <b>hexagonal Ice (I<sub>h</sub>) {00.1}</b> |                     |                                            |
| <b>2D-cell vectors</b>     | 2 × [10 $\bar{1}$ ] = 14.538<br>2 × [ $\bar{1}$ 10] = 14.538 | 3 × [100] = 13.539<br>3 × [010] = 13.539    | -7.38<br>-7.38      | Low-medium and cooperating linear misfits  |
| <b>2D-cell Area</b>        | 183.037                                                      | 158.746                                     | - <b>15.30</b>      | High area misfit                           |
| <b>Layer thickness (Å)</b> | 5 × d <sub>111</sub> = 14.838                                | 4 × d <sub>00.1</sub> = 14.712              | 0.85                | Low-medium compatibility for 2D absorption |

**Table ESI\_5.** The coincidence lattices between the alkali halides and the hexagonal Ice (I<sub>h</sub>) in the “LiBr mode” (a comparison between: *LiCl*, *KF*, *LiBr*, *NaCl*, *RbF*, *NaBr*, *CsF* and *LiI*).

|                            | Host crystal                                    | Guest crystal                               | Misfit<br><i>m</i> (%) | Notes                                     |
|----------------------------|-------------------------------------------------|---------------------------------------------|------------------------|-------------------------------------------|
| <b>2D-cell vectors</b>     | <b>LiCl {111}</b>                               | <b>hexagonal Ice (I<sub>h</sub>) {00.1}</b> |                        |                                           |
| <b>2D-cell Area</b>        | $[\bar{1}10]= 7.269$<br>$[10\bar{1}] = 7.269$   | $[\bar{1}10]= 7.817$<br>$[210]= 7.817$      | +7.54<br>+7.54         | Medium-low and cooperating linear misfits |
| <b>Layer thickness (Å)</b> | 45.759                                          | 52.919                                      | <b>+ 15.64</b>         | High area misfit                          |
|                            | $5 \times d_{111} = 14.84$                      | $4 \times d_{00.2} = 14.71$                 | <b>0.88</b>            | Low compatibility for 2D absorption       |
|                            | <b>KF {111}</b>                                 | <b>hexagonal Ice (I<sub>h</sub>) {00.1}</b> |                        |                                           |
| <b>2D-cell vectors</b>     | $[\bar{1}10]= 7.5618$<br>$[10\bar{1}] = 7.5618$ | $[\bar{1}10]= 7.817$<br>$[210]= 7.817$      | +3.37<br>+3.37         | Low and cooperating linear misfits        |
| <b>2D-cell Area</b>        | 49.520                                          | 52.919                                      | <b>+ 6.86</b>          | Low area misfit                           |
| <b>Layer thickness (Å)</b> | $6 \times d_{111} = 18.52$                      | $5 \times d_{00.2} = 18.38$                 | 0.72                   | Very low compatibility for 2D absorption  |
|                            | <b>LiBr {111}</b>                               | <b>hexagonal Ice (I<sub>h</sub>) {00.1}</b> |                        |                                           |
| <b>2D-cell vectors</b>     | $[\bar{1}10]= 7.779$<br>$[10\bar{1}] = 7.779$   | $[\bar{1}10]= 7.817$<br>$[210]= 7.817$      | +0.48<br>+0.48         | Very low and cooperating linear misfits   |
| <b>2D-cell Area</b>        | 52.413                                          | 52.919                                      | <b>+ 0.96</b>          | Very low area misfit                      |
| <b>Layer thickness (Å)</b> | $d_{111} = 3.176$                               | $d_{00.2} = 3.677$                          | 15.77                  | No compatibility for 2D absorption        |
|                            | <b>NaCl {111}</b>                               | <b>hexagonal Ice (I<sub>h</sub>) {00.1}</b> |                        |                                           |
| <b>2D-cell vectors</b>     | $[\bar{1}10]= 7.976$<br>$[10\bar{1}] = 7.976$   | $[\bar{1}10]= 7.817$<br>$[210]= 7.817$      | -2.04<br>-2.04         | Low and cooperating linear misfits        |
| <b>2D-cell Area</b>        | 55.093                                          | 52.919                                      | <b>-4.11</b>           | Low area misfit                           |
| <b>Layer thickness (Å)</b> | $6 \times d_{111} = 19.537$                     | $5 \times d_{00.2} = 18.38$                 | 6.25                   | Very low compatibility for 2D absorption  |
|                            | <b>RbF {111}</b>                                | <b>hexagonal Ice (I<sub>h</sub>) {00.1}</b> |                        |                                           |
| <b>2D-cell vectors</b>     | $[\bar{1}10]= 7.993$<br>$[10\bar{1}] = 7.993$   | $[\bar{1}10]= 7.817$<br>$[210]= 7.817$      | -2.25<br>-2.25         | Low and cooperating linear misfits        |
| <b>2D-cell Area</b>        | 55.328                                          | 52.919                                      | <b>-4.55</b>           | Low area misfit                           |
| <b>Layer thickness (Å)</b> | $6 \times d_{111} = 19.579$                     | $5 \times d_{00.2} = 18.38$                 | 6.48                   | Very low compatibility for 2D absorption  |

|                            |                                               |                                             |                |                                            |
|----------------------------|-----------------------------------------------|---------------------------------------------|----------------|--------------------------------------------|
|                            | <b>NaBr {111}</b>                             | <b>hexagonal Ice (I<sub>h</sub>) {00.1}</b> |                |                                            |
| <b>2D-cell vectors</b>     | $[\bar{1}10]= 8.453$<br>$[10\bar{1}] = 8.453$ | $[\bar{1}10]= 7.817$<br>$[210]= 7.817$      | -8.13<br>-8.13 | Medium and cooperating linear misfits      |
| <b>2D-cell Area</b>        | 61.88                                         | 52.919                                      | <b>-16.93</b>  | High area misfit                           |
| <b>Layer thickness (Å)</b> | $d_{111} = 3.451$                             | $d_{00.2} = 3.677$                          | 6.56           | Low-medium compatibility for 2D absorption |
|                            | <b>CsF {111}</b>                              | <b>hexagonal Ice (I<sub>h</sub>) {00.1}</b> |                |                                            |
| <b>2D-cell vectors</b>     | $[\bar{1}10]= 8.505$<br>$[10\bar{1}] = 8.505$ | $[\bar{1}10]= 7.817$<br>$[210]= 7.817$      | -8.80<br>-8.80 | Medium and cooperating linear misfits      |
| <b>2D-cell Area</b>        | 62.44                                         | 52.919                                      | <b>-18.38</b>  | High area misfit                           |
| <b>Layer thickness (Å)</b> | $d_{111} = 3.472$                             | $d_{00.2} = 3.677$                          | 5.90           | Low-medium compatibility for 2D absorption |
|                            | <b>LiI {111}</b>                              | <b>hexagonal Ice (I<sub>h</sub>) {00.1}</b> |                |                                            |
| <b>2D-cell vectors</b>     | $[\bar{1}10]= 8.518$<br>$[10\bar{1}] = 8.518$ | $[\bar{1}10]= 7.817$<br>$[210]= 7.817$      | -8.96<br>-8.96 | Medium and cooperating linear misfits      |
| <b>2D-cell Area</b>        | 62.835                                        | 52.919                                      | <b>-18.74</b>  | High area misfit                           |
| <b>Layer thickness (Å)</b> | $d_{111} = 3.477$                             | $d_{00.2} = 3.677$                          | 5.74           | Low-medium compatibility for 2D absorption |

**Table ESI\_6.** The coincidence lattices between the alkali halides and the hexagonal Ice (I<sub>h</sub>) in the “KCl mode” (a comparison between: *LiI*, *KCl*, *NaI*, *RbCl*, *KBr*, *RbBr*, *KI* and *RbI*).

|                            | <b>Host crystal</b>                           | <b>Guest crystal</b>                        | <b>Misfit <i>m</i> (%)</b> | <b>Notes</b>                        |
|----------------------------|-----------------------------------------------|---------------------------------------------|----------------------------|-------------------------------------|
|                            | <b>LiI {111}</b>                              | <b>hexagonal Ice (I<sub>h</sub>) {00.1}</b> |                            |                                     |
| <b>2D-cell vectors</b>     | $[\bar{1}10]= 8.518$<br>$[10\bar{1}] = 8.518$ | $[020]= 9.026$<br>$[200]= 9.026$            | +5.966<br>+5.966           | Low and cooperating linear misfits  |
| <b>2D-cell Area</b>        | 62.835                                        | 70.554                                      | <b>+ 12.28</b>             | High area misfit                    |
| <b>Layer thickness (Å)</b> | $5 \times d_{111} = 14.84$                    | $4 \times d_{00.2} = 14.71$                 | 0.88                       | Low compatibility for 2D absorption |
|                            | <b>KCl {111}</b>                              | <b>hexagonal Ice (I<sub>h</sub>) {00.1}</b> |                            |                                     |
| <b>2D-cell vectors</b>     | $[\bar{1}10]= 8.899$                          | $[020]= 9.026$                              | +1.42                      | Low and cooperating linear          |

|                            |                                                |                                             |                  |                                            |
|----------------------------|------------------------------------------------|---------------------------------------------|------------------|--------------------------------------------|
|                            | $[10\bar{1}] = 8.899$                          | $[200] = 9.026$                             | +1.42            | misfits                                    |
| <b>2D-cell Area</b>        | 68.582                                         | 70.554                                      | + <b>2.87</b>    | Low area misfit                            |
| <b>Layer thickness (Å)</b> | $d_{111} = 3.633$                              | $d_{00,2} = 3.677$                          | 1.20             | Very good compatibility for 2D absorption  |
|                            | <b>NaI {111}</b>                               | <b>hexagonal Ice (I<sub>h</sub>) {00.1}</b> |                  |                                            |
| <b>2D-cell vectors</b>     | $[\bar{1}10] = 9.154$<br>$[10\bar{1}] = 9.154$ | $[020] = 9.026$<br>$[200] = 9.026$          | -1.42<br>-1.42   | Low and cooperating linear misfits         |
| <b>2D-cell Area</b>        | 72.569                                         | 70.554                                      | - <b>2.85</b>    | Low area misfit                            |
| <b>Layer thickness (Å)</b> | $d_{111} = 3.737$                              | $d_{00,2} = 3.677$                          | 1.63             | Very good compatibility for 2D absorption  |
|                            | <b>RbCl {111}</b>                              | <b>hexagonal Ice (I<sub>h</sub>) {00.1}</b> |                  |                                            |
| <b>2D-cell vectors</b>     | $[\bar{1}10] = 9.307$<br>$[10\bar{1}] = 9.307$ | $[020] = 9.026$<br>$[200] = 9.026$          | -3.11<br>-3.11   | Low and cooperating linear misfits         |
| <b>2D-cell Area</b>        | 75.015                                         | 70.554                                      | - <b>6.32</b>    | Low-medium area misfit                     |
| <b>Layer thickness (Å)</b> | $d_{111} = 3.799$                              | $d_{00,2} = 3.677$                          | 3.32             | Very good compatibility for 2D absorption  |
|                            | <b>KBr {111}</b>                               | <b>hexagonal Ice (I<sub>h</sub>) {00.1}</b> |                  |                                            |
| <b>2D-cell vectors</b>     | $[\bar{1}10] = 9.334$<br>$[10\bar{1}] = 9.334$ | $[020] = 9.026$<br>$[200] = 9.026$          | -3.41<br>-3.41   | Low and cooperating linear misfits         |
| <b>2D-cell Area</b>        | 75.451                                         | 70.554                                      | - <b>6.94</b>    | Low-medium area misfit                     |
| <b>Layer thickness (Å)</b> | $d_{111} = 3.810$                              | $d_{00,2} = 3.677$                          | 3.63             | Very good compatibility for 2D absorption  |
|                            | <b>KBr {111}</b>                               | <b>hexagonal Ice (I<sub>h</sub>) {00.1}</b> |                  |                                            |
| <b>2D-cell vectors</b>     | $[\bar{1}10] = 9.742$<br>$[10\bar{1}] = 9.742$ | $[020] = 9.026$<br>$[200] = 9.026$          | -7.94<br>-7.94   | Low-medium and cooperating linear misfits  |
| <b>2D-cell Area</b>        | 82.191                                         | 70.554                                      | - <b>16.49</b>   | High area misfit                           |
| <b>Layer thickness (Å)</b> | $d_{111} = 3.977$                              | $d_{00,2} = 3.677$                          | 8.14             | Low compatibility for 2D absorption        |
|                            | <b>KI {111}</b>                                | <b>hexagonal Ice (I<sub>h</sub>) {00.1}</b> |                  |                                            |
| <b>2D-cell vectors</b>     | $[\bar{1}10] = 9.993$<br>$[10\bar{1}] = 9.993$ | $[020] = 9.026$<br>$[200] = 9.026$          | -10.71<br>-10.71 | Medium-high and cooperating linear misfits |
| <b>2D-cell Area</b>        | 86.481                                         | 70.554                                      | - <b>22.57</b>   | Very high area misfit                      |
| <b>Layer thickness</b>     | $d_{111} = 4.079$                              | $d_{00,2} = 3.677$                          | 10.93            | Very low compatibility for                 |

| (Å)                        |                                                 |                                             |                  | 2D absorption                            |
|----------------------------|-------------------------------------------------|---------------------------------------------|------------------|------------------------------------------|
|                            | <b>RbI {111}</b>                                | <b>hexagonal Ice (I<sub>h</sub>) {00.1}</b> |                  |                                          |
| <b>2D-cell vectors</b>     | $[\bar{1}10]= 10.383$<br>$[10\bar{1}] = 10.383$ | $[020]= 9.026$<br>$[200]= 9.026$            | -15.03<br>-15.03 | Very high and cooperating linear misfits |
| <b>2D-cell Area</b>        | 93.363                                          | 70.554                                      | <b>- 32.32</b>   | Very high area misfit                    |
| <b>Layer thickness (Å)</b> | $5 \times d_{111} = 21.195$                     | $6 \times d_{00.2} = 22.065$                | 4.10             | Low compatibility for 2D absorption      |
